# Supplementary material
Source: publisher site journal article supplement (https://www.dovepress.com/article/557301)
Supplement: Supplementary file 1 [file 557301%20Revised%20Table%20S1.docx]

| **Table S1. STROBE Checklist** | | | |
| --- | --- | --- | --- |
| **Item No.** | **Recommendation** | **Page No.** | **Relevant Text from Manuscript / Summary** |
| **1(a)** | Indicate the study’s design in the title or abstract | Page 1 | Title: *“Association Between Receiving Medication Information and Adherence to Antihypertensive Medication: Findings from the 2023 Indonesian Health Survey.”* Abstract mentions: “This cross-sectional study used data from the 2023 Indonesian Health Survey.” |
| **1(b)** | Provide informative and balanced summary in abstract | Page 2 | Abstract includes purpose, methods results, and conclusion. |
| **2** | Explain scientific background and rationale | Page 3-4 | Paragraphs describe hypertension burden, global and national relevance, role of adherence, knowledge gap in Indonesia, and rationale for examining information receipt and adherence. |
| **3** | State specific objectives | Page 4 | “This study aimed to evaluate the association between receiving medication information and adherence to antihypertensive medication within the broader Indonesian population of hypertensive patients.” |
| **4** | Present key elements of study design early | Page 4 | Methods section starts with: “This study is presented following the cross-sectional studies guidelines: Strengthening the Reporting of Observational Studies in Epidemiology (STROBE).” |
| **5** | Describe setting, locations, and relevant dates | Page 4-5 | Data source: Nationwide secondary data from the 2023 Indonesian Health Survey… conducted across 34,500 census blocks in all 38 provinces of Indonesia.  Data collection involved face-to-face interviews conducted across 34,500 census blocks in all 38 provinces of Indonesia 31. |
| **6** | Eligibility criteria and selection of participants | Page 5 | Inclusion: ≥15 years old, diagnosed hypertension (≥140/90 mmHg), resident ≥1 month. Exclusion: declined or incomplete data. Sampling via stratified multistage cluster. |
| **7** | Define outcomes, exposures, confounders | Page 6–7 | Dependent: medication adherence (single self-report). Independent: receipt of medication information (yes/no). Confounders: age, sex, education, marital status, occupation, island of residence, duration of hypertension. |
| **8** | Data sources and measurement methods | Page 6–7 | Source: 2023 Indonesian Health Survey questionnaire. Assessment by structured interview; single items for adherence and medication information. |
| **9** | Describe efforts to address bias | Page 8 | Limitation acknowledges potential recall and social desirability bias from self-report; also addresses absence of sampling weights and cross-sectional limits. |
| **10** | Explain how study size was arrived at | Page 5 | Uses full available national subsample of hypertensive respondents from 877,531 participants.  The survey employed a stratified multi-stage cluster sampling technique. From a total sample size of 877,531 in the survey, the selection process was as follows: |
| **11** | Handling of quantitative variables | Page 7 | Continuous variables (e.g., age) categorized into groups. |
| **12(a)** | Describe all statistical methods incl. confounder control | Page 7 | Bivariate analysis (Chi-square) and binary logistic regression with covariate adjustment. adjusted odds ratios with 95% CI reported. |
| **12(b)** | Methods for subgroup or interaction | – | Not applicable; no subgroup or interaction analysis conducted. |
| **12(c)** | Explain how missing data were addressed | Page 7 | Missing data were handled using complete case analysis. |
| **12(d)** | Analytical methods accounting for sampling | Page 13 | States limitation: sampling weights not applied, may affect accuracy of estimates. |
| **12(e)** | Sensitivity analyses | – | NA |
| **13(a)** | Report numbers at each study stage | Page 6 | Figure 1 presents selection flow: eligible, excluded, and final analytic sample. |
| **13(b)** | Reasons for non-participation | Page 6 | Excluded for refusal or incomplete data (stated). |
| **13(c)** | Flow diagram | Page 6 | Figure 1: “Respondent selection process.” |
| **14(a)** | Characteristics of participants | Page 8 | Table 1 shows sociodemographic and hypertension-related characteristics by adherence status. |
| **14(b)** | Missing data numbers per variable | – | NA |
| **15** | Report numbers of outcome events or summary measures | Page 8-9 | Table 1,3. |
| **16(a)** | Give unadjusted and adjusted estimates | Page 9 | Table 3 shows crude and adjusted ORs with 95% CIs for non-adherence. Confounders listed. |
| **16(b)** | Report category boundaries | Page 6-7 | Categories for each variable stated in the method section. |
| **17** | Report other analyses (subgroup/sensitivity) | – | NA |
| **18** | Summarise key results | Page 9 | Discussion begins by summarizing prevalence of non-adherence and association between lack of information about the importance of antihypertensive medication and and non-adherence. |
| **19** | Discuss limitations and bias | Page 12-13 | Limitations stated: self-report bias, the use of single self-report questions, cross-sectional design, absence of sampling weights, and lacked information on other potentially relevant factors. |
| **20** | Overall interpretation considering context | Page 9–12 | Discussion integrates findings with prior studies. |
| **21** | Discuss generalisability | Page 12 | The strength of this study is its use of a nationally representative dataset, which enhances the generalisability and external validity of the findings. |
| **22** | Funding and role of funders | Page 15 | This research did not receive any specific grant from funding agencies in the public, commercial, or non-profit sectors. |
